# Supplementary material for: Phenome-wide analysis reveals epistatic associations between APOL1 variants and chronic kidney disease and multiple other disorders
Source: PubMed Central journal article supplement (PMC10944146; doi:10.1016/j.ebiom.2024.105000), 2024-02-14
Supplement: mmc1.pdf [file mmc1.pdf]

## Supplementary data

| Chapter | ICD codes | Description                                                                                         |
|---------|-----------|-----------------------------------------------------------------------------------------------------|
| I       | A00-B99   | Certain infectious and parasitic diseases                                                           |
| II      | C00-D48   | Neoplasms                                                                                           |
| III     | D50-D89   | Diseases of the blood and blood-forming organs and certain disorders involving the immune mechanism |
| IV      | E00-E90   | Endocrine, nutritional, and metabolic disorders                                                     |
| V       | F00-F99   | Mental and behavioural disorders                                                                    |
| VI      | G00-G99   | Diseases of the nervous system                                                                      |
| VII     | H00-H59   | Diseases of the eye and adnexa                                                                      |
| VIII    | H60-H95   | Diseases of the ear and mastoid process                                                             |
| IX      | I00-I99   | Diseases of the circulatory system                                                                  |
| X       | J00-J99   | Diseases of the respiratory system                                                                  |
| XI      | K00-K93   | Diseases of the digestive system                                                                    |
| XII     | L00-L99   | Diseases of the skin and subcutaneous tissue                                                        |
| XIII    | M00-M99   | Diseases of the musculoskeletal system and connective tissue                                        |
| XIV     | N00-N99   | Diseases of the genitourinary system                                                                |
| XV      | O00-O99   | Pregnancy, childbirth, and the puerperium                                                           |
| XVI     | P00-P96   | Certain conditions of the perinatal period                                                          |
| XVII    | Q00-Q99   | Congenital malformations, deformations, and clinical abnormalities                                  |
| XXII    | U00-U85   | Codes for special purposes                                                                          |

**Supplementary Table 1: International Classification of Disease codes examined in this study, by chapter. Adapted from World Health Organization *ICD-10 Version:2019*(17).**

| Data collected at UK Biobank enrolment | UK Biobank data field(s) |
|----------------------------------------|--------------------------|
| Age when attended assessment centre    | 21003                    |
| Blood pressure, diastolic              | 4079                     |
| Blood pressure, systolic               | 4080                     |
| Creatinine                             | 30700                    |
| Creatinine (enzymatic) in urine        | 30510                    |
| Cystatin C                             | 30720                    |
| Medications taken                      | 6153, 6177, 20003        |
| Microalbumin in urine                  | 30500                    |
| Self-reported illness                  | 20002                    |
| Sex                                    | 31                       |
| Standing height                        | 50                       |
| Townsend Deprivation Index             | 189                      |
| Weight                                 | 21002                    |

**Supplementary Table 2: UK Biobank data fields used to identify chronic kidney disease indicators, associated conditions, and covariates as described in Methods.**

| Genotype/<br>grouping | ICD<br>code | ICD code descriptor                                                          | ICD coding<br>chapter | p-<br>value | Odds ratio<br>(95% CI) | False discovery<br>rate |
|-----------------------|-------------|------------------------------------------------------------------------------|-----------------------|-------------|------------------------|-------------------------|
| G0/G2                 | H35         | Other retinal disorders                                                      | VII                   | 0.0005      | 2.1 (1.4-3.2)          | 0.090                   |
| G1/G2                 | A09         | Diarrhoea and gastro-enteritis of presumed infectious origin                 | I                     | 0.02        | 1.9 (1.1-3.1)          | 0.163                   |
| G1/G2                 | B18         | Chronic viral hepatitis                                                      | I                     | 0.005       | 4.0 (1.6-9.4)          | 0.122                   |
| G1/G2                 | B96         | Other bacterial agents as the cause of diseases classified to other chapters | I                     | 0.02        | 1.8 (1.1-2.8)          | 0.163                   |
| G1/G2                 | B97         | Viral agents as the cause of diseases classified to other chapters           | I                     | 0.03        | 2.2 (1.1-4.1)          | 0.180                   |
| G1/G2                 | E16         | Other disorders of pancreatic internal secretion                             | IV                    | 0.005       | 2.8 (1.4-5.2)          | 0.122                   |
| G1/G2                 | E55         | Vitamin D deficiency                                                         | IV                    | 0.004       | 2.3 (1.3-4.0)          | 0.122                   |
| G1/G2                 | F41         | Other anxiety disorders                                                      | V                     | 0.03        | 2.0 (1.1-3.6)          | 0.181                   |
| G1/G2                 | I08         | Multiple valve diseases                                                      | IX                    | 0.01        | 2.7 (1.3-5.4)          | 0.142                   |
| G1/G2                 | I35         | Nonrheumatic aortic valve disorders                                          | IX                    | 0.009       | 3.8 (1.4-9.1)          | 0.142                   |
| G1/G2                 | I45         | Other conduction disorders                                                   | IX                    | 0.01        | 3.3 (1.4-7.3)          | 0.142                   |
| G1/G2                 | I73         | Other peripheral vascular diseases                                           | IX                    | 0.005       | 2.9 (1.4-5.8)          | 0.122                   |
| G1/G2                 | J12         | Viral pneumonia, not elsewhere classified                                    | X                     | 0.02        | 2.3 (1.2-4.4)          | 0.171                   |
| G1/G2                 | J96         | Respiratory failure, not elsewhere classified                                | X                     | 0.02        | 2.1 (1.1-3.8)          | 0.171                   |
| G1/G2                 | K22         | Other diseases of the oesophagus                                             | XI                    | 0.004       | 2.6 (1.4-4.7)          | 0.122                   |
| G1/G2                 | K56         | Pancreatic ileus and intestinal obstruction without hernia                   | XI                    | 0.02        | 2.3 (1.1-4.4)          | 0.180                   |
| G1/G2                 | K58         | Irritable bowel syndrome                                                     | XI                    | 0.02        | 2.5 (1.2-4.7)          | 0.163                   |

|       |     |                                                                       |      |       |               |       |
|-------|-----|-----------------------------------------------------------------------|------|-------|---------------|-------|
| G1/G2 | K59 | Other functional intestinal disorders                                 | XI   | 0.009 | 1.7 (1.1-2.5) | 0.142 |
| G1/G2 | K66 | Other disorders of peritoneum                                         | XI   | 0.02  | 2.6 (1.2-5.1) | 0.163 |
| G1/G2 | M15 | Polyarthrosis                                                         | XIII | 0.02  | 2.8 (1.2-5.7) | 0.163 |
| G1/G2 | N13 | Obstructive and reflux neuropathy                                     | XIV  | 0.004 | 3.6 (1.6-7.7) | 0.122 |
| G1/G2 | N17 | Acute renal failure                                                   | XIV  | 0.03  | 1.7 (1.1-2.5) | 0.180 |
| G1/G2 | N28 | Other disorders of the kidney and ureter, not elsewhere classified    | XIV  | 0.02  | 2.2 (1.1-4.1) | 0.177 |
| G1/G2 | N40 | Hyperplasia of prostate                                               | XIV  | 0.01  | 2.0 (1.2-3.5) | 0.163 |
| G1/G2 | O26 | Maternal care for other conditions predominantly related to pregnancy | XV   | 0.005 | 3.5 (1.5-7.4) | 0.122 |
| G1/G2 | O36 | Maternal care for other known or suspected foetal problems            | XV   | 0.01  | 3.3 (1.4-7.4) | 0.142 |
| G1/G2 | U07 | Emergency use of U07                                                  | XXII | 0.002 | 2.5 (1.4-4.2) | 0.122 |

**Supplementary Table 3: Level 2 International Classification of Disease, Version 9 and 10 (ICD-9 and ICD-10) codes for which a potential association with *APOL1* risk alleles was indicated by the phenome-wide screen using data from UK Biobank participants with African ancestry.**

| Chapter | Level 2 codes analysed | Level 2 codes with P<0.05 and FDR<20% (%) | p     |
|---------|------------------------|-------------------------------------------|-------|
| I/U07   | 11                     | 5 (45.5%)                                 | 0.002 |
| II      | 13                     | 0 (0%)                                    | 0.18  |
| III     | 7                      | 0 (0%)                                    | 0.33  |
| IV      | 14                     | 2 (14.3%)                                 | 0.67  |
| V       | 8                      | 1 (12.5%)                                 | 0.97  |
| VI      | 10                     | 0 (0%)                                    | 0.25  |
| VII     | 15                     | 0 (0%)                                    | 0.16  |
| VIII    | 1                      | 0 (0%)                                    | 0.71  |
| IX      | 27                     | 4 (14.8%)                                 | 0.67  |
| X       | 11                     | 2 (18.2%)                                 | 0.54  |
| XI      | 31                     | 5 (16.1%)                                 | 0.52  |
| XII     | 8                      | 0 (0%)                                    | 0.30  |
| XIII    | 25                     | 1 (4.0%)                                  | 0.23  |
| XIV     | 26                     | 4 (15.4%)                                 | 0.62  |
| XV      | 10                     | 2 (20.0%)                                 | 0.45  |
| XVI     | 0                      | 0 (0%)                                    | N/A   |
| XVII    | 0                      | 0 (0%)                                    | N/A   |
| Total   | 217                    | 26 (12.0%)                                |       |

**Supplementary Table 4: Counts of Level 2 ICD codes for which a potential association with the G1/G2 genotype was indicated by the phenome-wide screen, by coding chapter. P values are for an excess of phenotypes with an association in each chapter calculated using z-score tests.**

| Genotype     | n (total) | ICD codes per participant | p             |
|--------------|-----------|---------------------------|---------------|
| G0/G0        | 2,853     | 6.5                       |               |
| G0/G1        | 2,273     | 7.1                       | 0.85          |
| G0/G2        | 1,219     | 6.8                       | 0.79          |
| G1/G1        | 644       | 6.7                       | 0.59          |
| <b>G1/G2</b> | 320       | <b>8.7</b>                | <b>0.0003</b> |
| G2/G2        | 153       | 6.3                       | 0.18          |

**Supplementary Table 5: International Classification of Disease, Version 9 and 10 (ICD-9 and ICD-10) codes per participant, comparing *APOL1* genotypes containing risk variants relative to G0/G0. Adjusted for age, sex, body mass index, Townsend deprivation index, and principal components 1-4. P values ≤0.05 are shown in bold.**

| ICD code | ICD code descriptor                                         | Primary analysis model |                      |                      | Model 2      |                      |                      |
|----------|-------------------------------------------------------------|------------------------|----------------------|----------------------|--------------|----------------------|----------------------|
|          |                                                             | p-value                | Odds ratio (95% CI)  | False discovery rate | p-value      | Odds ratio (95% CI)  | False discovery rate |
| A09      | Diarrhoea and gastroenteritis of presumed infectious origin | <b>0.01</b>            | <b>1.9 (1.1-3.1)</b> | <b>0.16</b>          | <b>0.001</b> | <b>2.9 (1.5-5.5)</b> | <b>0.10</b>          |

|     |                                                                              |      |               |      |       |               |      |
|-----|------------------------------------------------------------------------------|------|---------------|------|-------|---------------|------|
| B96 | Other bacterial agents as the cause of diseases classified to other chapters | 0.02 | 1.8 (1.1-2.8) | 0.16 | 0.001 | 2.8 (1.5-5.1) | 0.08 |
| E87 | Other disorders of fluid, electrolyte, and acid-base balance                 | 0.06 | 1.5 (1.0-2.4) | 0.35 | 0.001 | 2.7 (1.5-4.7) | 0.08 |
| J96 | Respiratory failure, not elsewhere classified                                | 0.02 | 2.1 (1.1-3.8) | 0.17 | 0.005 | 3.2 (1.4-7.1) | 0.18 |
| N17 | Acute renal failure                                                          | 0.02 | 1.6 (1.1-2.5) | 0.18 | 0.005 | 2.2 (1.3-3.7) | 0.18 |
| N32 | Other disorders of the bladder                                               | 0.03 | 1.8 (1.0-3.0) | 0.22 | 0.005 | 2.6 (1.3-5.0) | 0.18 |

**Supplementary Table 6: Level 2 International Classification of Disease, Version 9 and 10 (ICD-9 and ICD-10) for which a potential association with the G1/G2 interaction was indicated by the phenome-wide screen using Model 2. P-values, odds ratios, and false discovery rates for each code using the Primary Analysis models displayed for comparison.**

| Number of variants | n (total) | uACR >3 mg/mmol or eGFR <60 mL/min/1.73m <sup>2</sup> | uACR >3 mg/mmol | eGFR <60 mL/min/1.73m <sup>2</sup> |
|--------------------|-----------|-------------------------------------------------------|-----------------|------------------------------------|
| 0 variants         | 2,853     | 276 (9.7%)                                            | 205 (7.2%)      | 91 (3.2%)                          |
| 1 variant          | 3,492     | 373 (10.7%)                                           | 284 (8.1%)      | 120 (3.4%)                         |
| 2 variants         | 1,117     | 159 (14.2%)                                           | 122 (10.9%)     | 58 (5.2%)                          |

**Supplementary Table 7: indicators of CKD among UK Biobank participants with African ancestry, comparing rates by number of *APOL1* variants.**

| Genotype | n (total) | uACR >3 mg/mmol or eGFR <60 mL/min/1.73m <sup>2</sup> | uACR >3 mg/mmol | eGFR <60 mL/min/1.73m <sup>2</sup> |
|----------|-----------|-------------------------------------------------------|-----------------|------------------------------------|
| G0/G0    | 2,853     | 276 (9.7%)                                            | 205 (7.2%)      | 91 (3.2%)                          |
| G0/G1    | 2,273     | 239 (10.5%)                                           | 184 (8.1%)      | 76 (3.3%)                          |
| G0/G2    | 1,219     | 134 (11.0%)                                           | 100 (8.2%)      | 44 (3.6%)                          |
| G1/G1    | 644       | 93 (14.4%)                                            | 74 (11.5%)      | 29 (4.5%)                          |
| G1/G2    | 320       | 48 (15.0%)                                            | 37 (11.6%)      | 17 (5.3%)                          |
| G2/G2    | 153       | 18 (11.7%)                                            | 11 (7.2%)       | 12 (7.8%)                          |

**Supplementary Table 8: indicators of CKD among UK Biobank participants with African ancestry, comparing rates by *APOL1* genotype.**

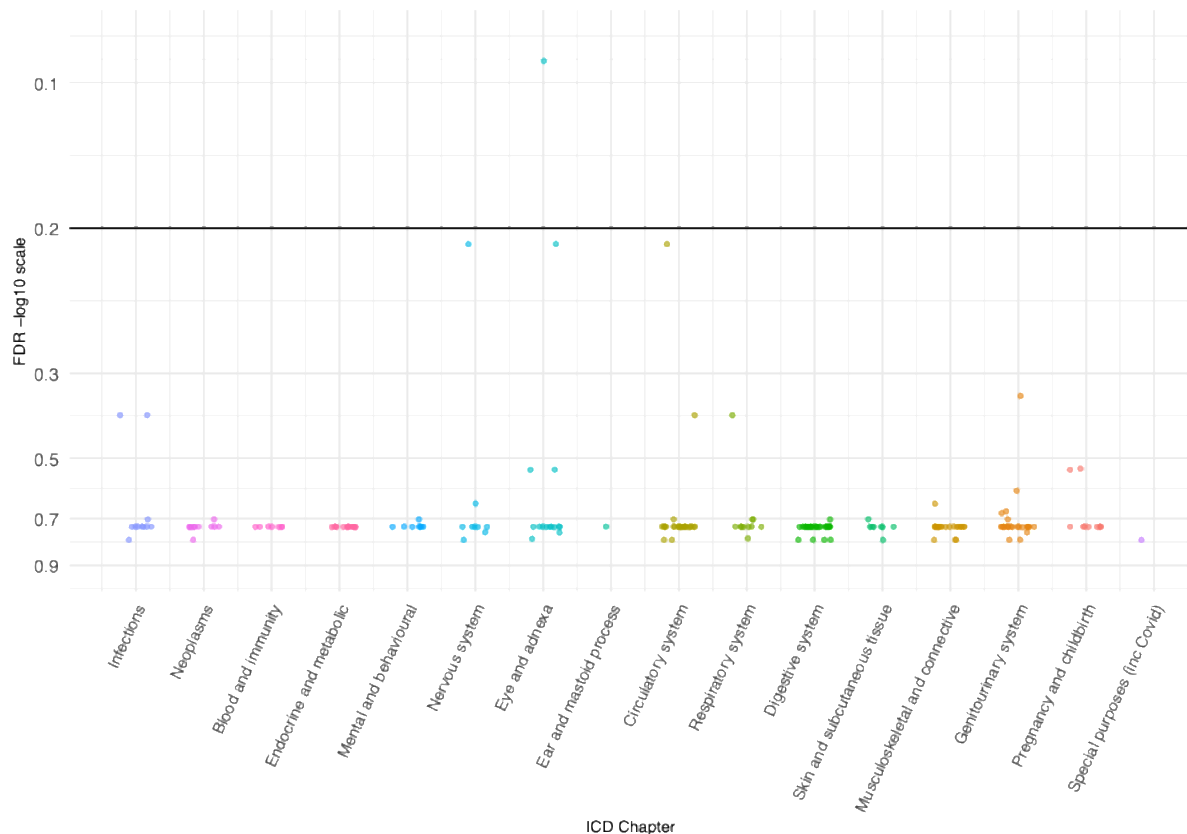

**Supplementary Figure 1: Plot of false discovery rate values showing associations between each ICD Level 2 code tested in the phenotype-wide data and the *APOL1* G0/G2 genotype.**

### Identification of end stage kidney disease

End stage kidney disease (ESKD) as of September 2022 was defined as reaching CKD stage G5 or the requirement for kidney replacement therapy, using ICD-10 codes for hospital admission, or Office of Population Censuses and Surveys Classification of Surgical Operations and Procedures, Version 4 (OPCS4) codes for operative procedures. Participants were considered to have developed ESKD if ICD-10 codes E853, N165, N180, N185, Q601, T824, T861, Y602, Y612, Y622, Y841, Z490, Z491, Z492, Z940, Z992, or OPCS4 codes L741, L742, L743, L744, L745, L746, L748, L749, M012, M013, M014, M015, M018, M019, M023, M084, M172, M174, M178, M179, X401, X402, X403, X404, X405, X406, X407, X408, X409, X411, X412, X418, X419, X421, X428, X429, X431 had been recorded, or if ICD-10 codes N180 or N185 appear in any position in their death record.

### Sensitivity analysis

The ability to detect associations between the different haplotype combinations and phenotype codes using the Biobank data set for participants with African Heritage with the logistic regression model described above was estimated by simulation. Sensitivity was estimated by assigning phenotypes at random and finding the minimum odds ratio > 1 with nominal  $p < 0.05$  observed for each haplotype combination. The same model was used as for the main analysis. Firth's bias-reduced logistic regression was used to test the association of each phenotype with the six *APOL1* haplotype combinations. Covariates were age, sex, Townsend deprivation index, hypertension, diabetes and the first 10 UK Biobank principal

components. Given the fixed sample size, the main factors determining power in this analysis are the numbers of participants with each phenotype code and the frequency of the haplotype combinations. The deciles of the counts of phenotype codes were obtained and for each decile 1000 replicate analyses were conducted with phenotypes assigned at random to participants to obtain a range of odds ratios and p values. For each decile and haplotype combination the minimum observed odds ratio with nominal  $p < 0.05$  was taken as an estimate of the sensitivity of the model to detect an association with that haplotype combination and that number of affected participants.

The counts of participants with each phenotype were obtained and for each decile of the counts distribution an estimate was made of the minimum odds ratio  $> 1$  with nominal  $p < 0.05$  that could be obtained with the model and the number of participants with each haplotype combination (Supplementary Figure 2). As expected, the minimum detectable odds ratio was inversely related to the number of participants with each haplotype combination. The G1/G2 combination which had the most associations with phenotype after the FDR correction had the second-highest minimum detectable odds ratio, indicating that the excess of associations with this haplotype combination was not due to a relatively high power to detect associations with participants with this combination. Conversely G2/G2 had a much lower power than other haplotype combinations and it is possible that associations with this haplotype combination have been underestimated due to lack of power.

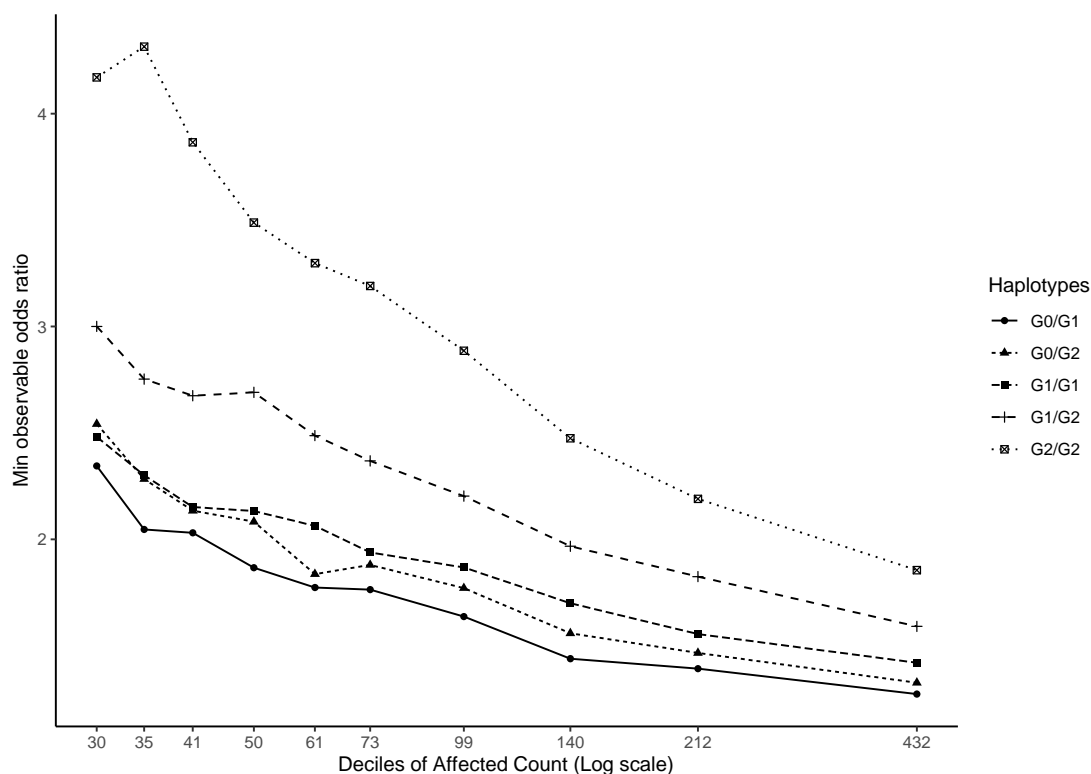

**Supplementary Figure 2. Minimum odds ratios for each haplotype combination and decile of affected counts with  $p < 0.05$ . Odds ratios and p values were generated by applying the phenome wide regression model to a dummy phenotype with 'Count Affected' numbers of participants being randomly assigned as cases. The affected count represents the deciles of the distribution of numbers affected.**

### Interaction analysis and epistasis

Phenome-wide scan data (Table 2) was obtained considering the six observed *APOL1* genotypes as a single independent variable with six levels. For each ICD code, the effect of the five non-G0/G0 genotypes was tested against G0/G0. In addition, we formally tested for interaction in the G1/G2 genotype by running a model (Model 2) with genotype at the G1 locus, genotype at the G2 locus, and the G1/G2 interaction term as separate independent variables. These three variables produce the same total of five non-reference levels as the primary analysis model, however the null hypotheses being tested differs: in Model 2, the effect of the G1/G2 interaction was estimated relative to the effect expected by combining the independent effects of heterozygosity at the G1 locus and heterozygosity at the G2 locus, rather than relative to G0/G0. All other covariates were the same in both models. Model 2 identified six ICD codes showing an association with the G1/G2 interaction, compared with 26 that were associated with the G1/G2 genotype in the primary analysis model (Supplementary Table 8). Four of these six ICD codes were identified by both models.

The possible reasons why an interaction effect was not detected for 22 of the 26 that showed a significant main effect of G1/G2 are (1) that there is no interaction effect; (2) that there is less power to detect an interaction effect than to detect the main effect of G1/G2. We argue that lack of power is likely to have significantly reduced our ability to detect interactions. The power of Model 2 to detect an association is expected to be lower for two reasons.

First, in our primary analysis model, the effect of the G1/G2 genotype is a measure of the independent effects of heterozygosity and the G1 locus, heterozygosity and the G2 locus, and the interaction between G1 and G2 in participants with the G1/G2 genotype. It is the sum of these effects that are significantly associated with ICD codes. Model 2 detects associations with each of these factors independently. The 26 associations with the G1/G2 genotype identified in the primary analysis model all have odds ratios >1. In this model, the mean odds ratios for the G0/G1 genotype (i.e. heterozygosity at the G1 locus alone) and the G0/G2 genotype (heterozygosity at the G2 locus alone) are 1.14 and 1.08 respectively, indicating that the main effects of the genotypes at each locus are contributing positively to the overall effect, whereas the mean odds ratios for heterozygosity at the G1 locus and heterozygosity at the G2 locus for the six associations detected in Model 2 are 0.85 and 0.78. These differences in odds ratios between models is significant:  $p = 0.0006$  and  $p = 0.0001$  for heterozygosity at the G1 and G2 locus respectively (paired t-test). This indicates that in our primary analysis model, the independent effects of G1 and G2 are in the same direction as the interaction effect, enhancing the power to detect associations with the G1/G2 genotype. Conversely, the mean odds ratios for heterozygosity at the G1 and G2 loci in Model 2 are <1, even though the G1/G2 interaction has an odds ratio of >1, suggesting that there is power to detect a positive interaction effect when the individual effects are negative.

Second, comparing the G1/G2 interaction in Model 2 with a model-predicted combined effect rather than the risk estimated from a single common genotype adds uncertainty and therefore reduces power. This additional uncertainty is reflected in the mean standard error of the G1/G2 interaction in Model 2 (0.43) was larger than that for the G1/G2 genotype in the primary analysis model (0.33) for the 26 ICD codes associated with the G1/G2 genotype

(paired t-test,  $p = 9 \times 10^{-15}$ , showing that Model 2 would require more samples than the primary analysis model to detect the same effect.

In the primary analysis model, no associations with ICD codes were detected for the G1/G1 genotype (compared to 26 for the G1/G2 genotype) despite their being 644 G1/G2 participants and only 320 G1/G2 participants. This is suggestive of an epistatic interaction. The data from Model 2 indicates that some associations with the G1/G2 interaction occur, and the lower power to formally detect associations in this model suggests that more would be detected with larger numbers of samples.
